# Supplementary material for: Self-aggregation of ionic liquids: micelle formation in aqueous solution
Source: Royal Society of Chemistry journal article supplement (doi:10.1039/b615406a), 2007-01-01
Supplement: b615406a.pdf [file b615406a.pdf]

## **ELECTRONIC SUPPLEMENTARY INFORMATION**

### **Self-aggregation of ionic liquids: micelle formation in aqueous solution**

Marijana Blesic,<sup>a</sup> Maria Helena Marques,<sup>a</sup>  
Natalia V. Plechkova,<sup>b</sup> Kenneth R. Seddon,<sup>a,b</sup> Luís Paulo N. Rebelo,<sup>a\*</sup> and  
António Lopes<sup>a\*</sup>

*Instituto de Tecnologia Química e Biológica, ITQB 2, Universidade Nova de Lisboa, Apartado  
127, 2780-901 Oeiras, Portugal*

*<sup>a</sup> The QUILL Centre, The Queen's University of Belfast, Stranmillis Road, Belfast BT9 5AG, United  
Kingdom*

\* To whom correspondence should be addressed: [luis.rebelo@itqb.unl.pt](mailto:luis.rebelo@itqb.unl.pt) or [alopes@itqb.unl.pt](mailto:alopes@itqb.unl.pt)

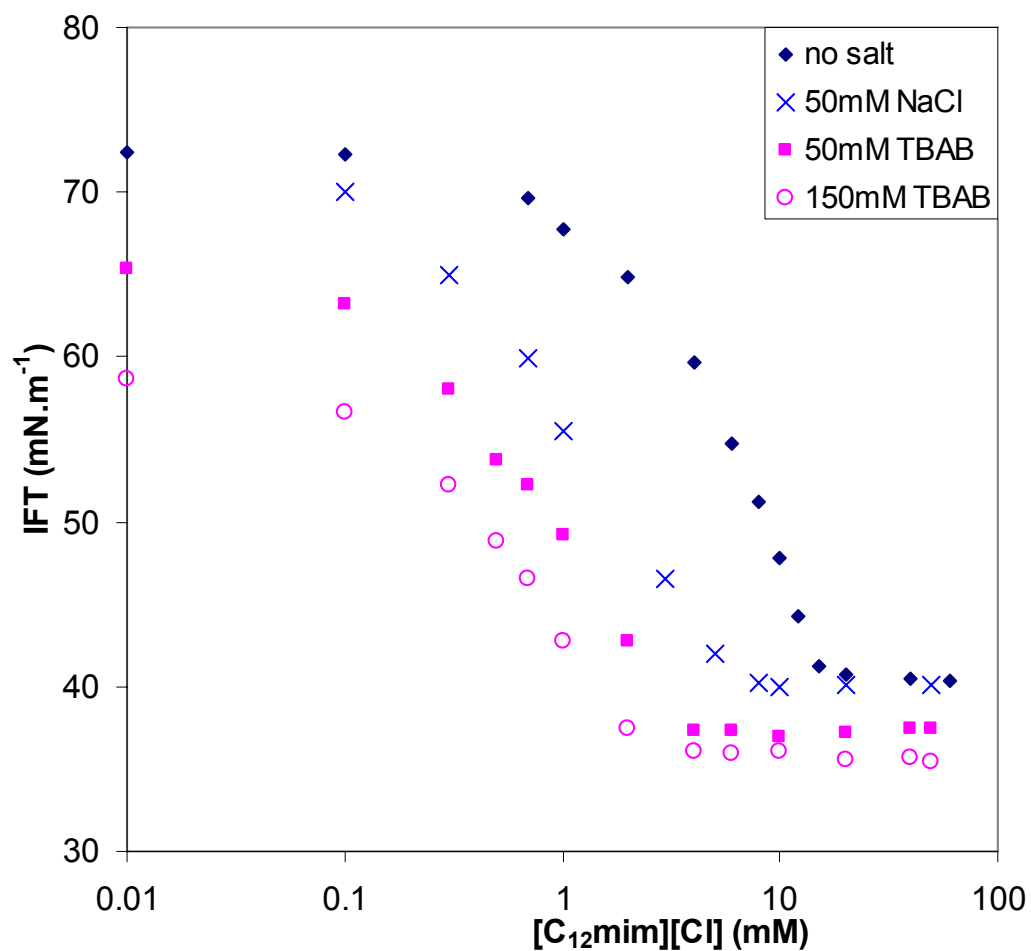

Figure S1 – Salt type effect on the CMC of  $[C_{12}mim]Cl$  by IFT. NaCl versus  $[N_{4444}]Br$  (TBAB).

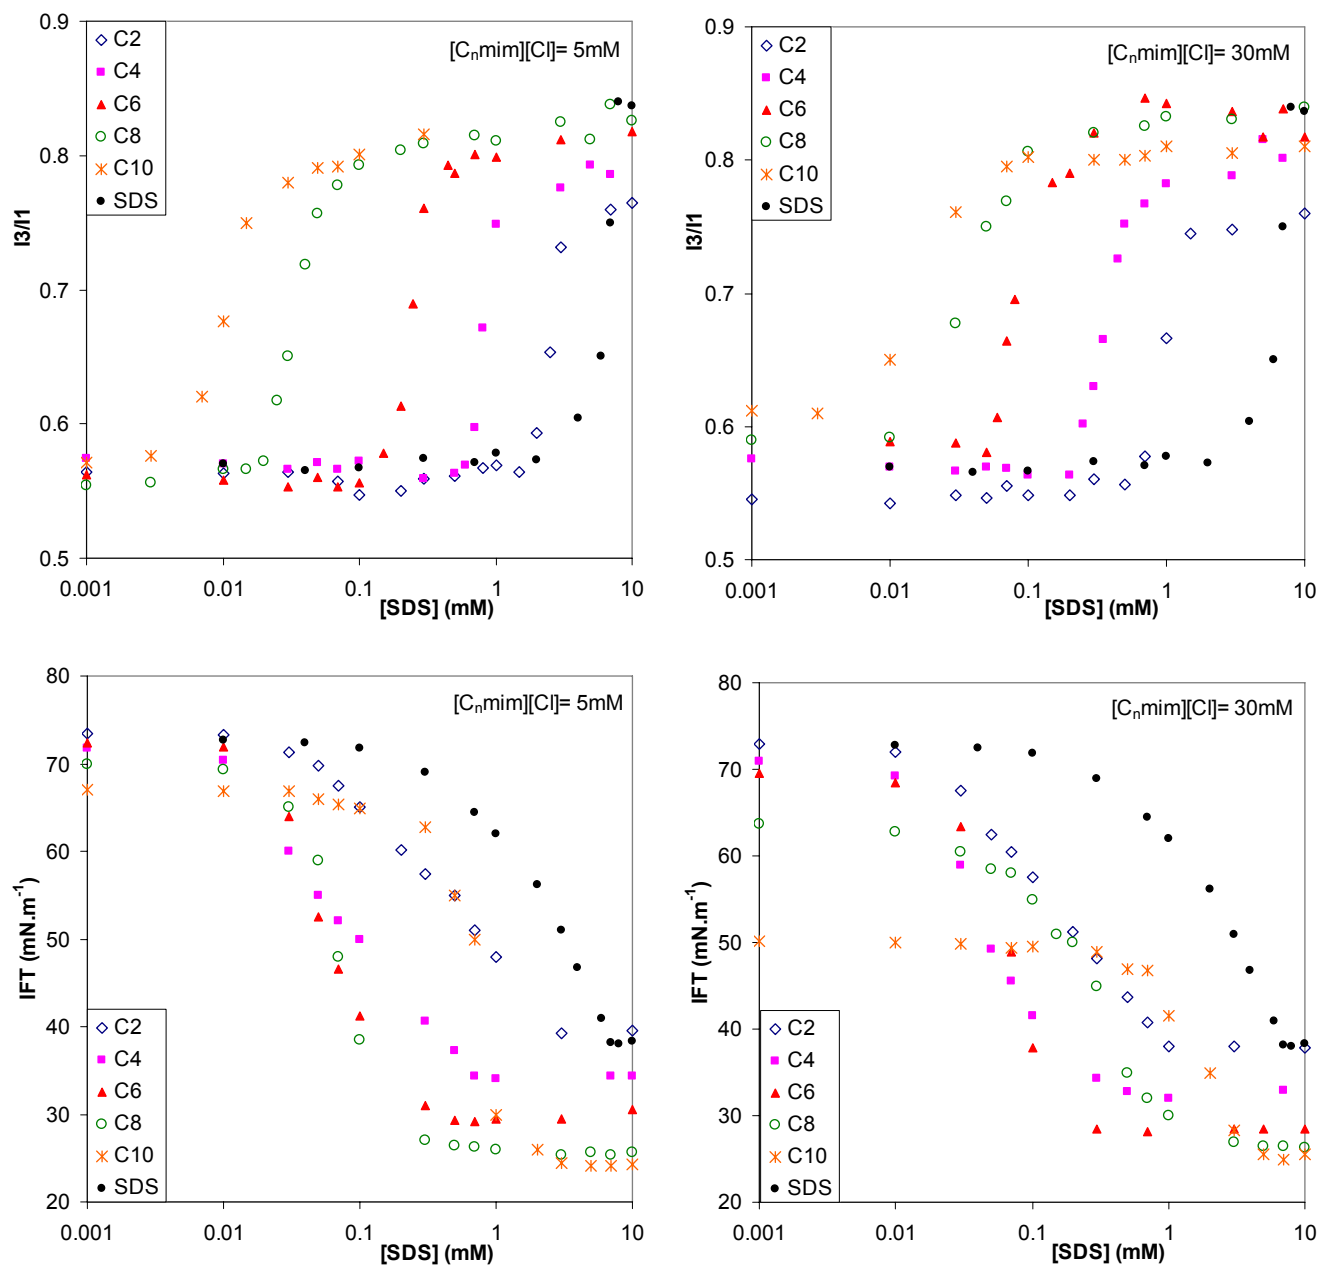

Figure S2 –  $[C_n \text{mim}][Cl]$  effect on the SDS aggregation monitored by the IFT and fluorescence techniques (plots similar to those illustrated as Figure 4 of the main text for different IL concentration).

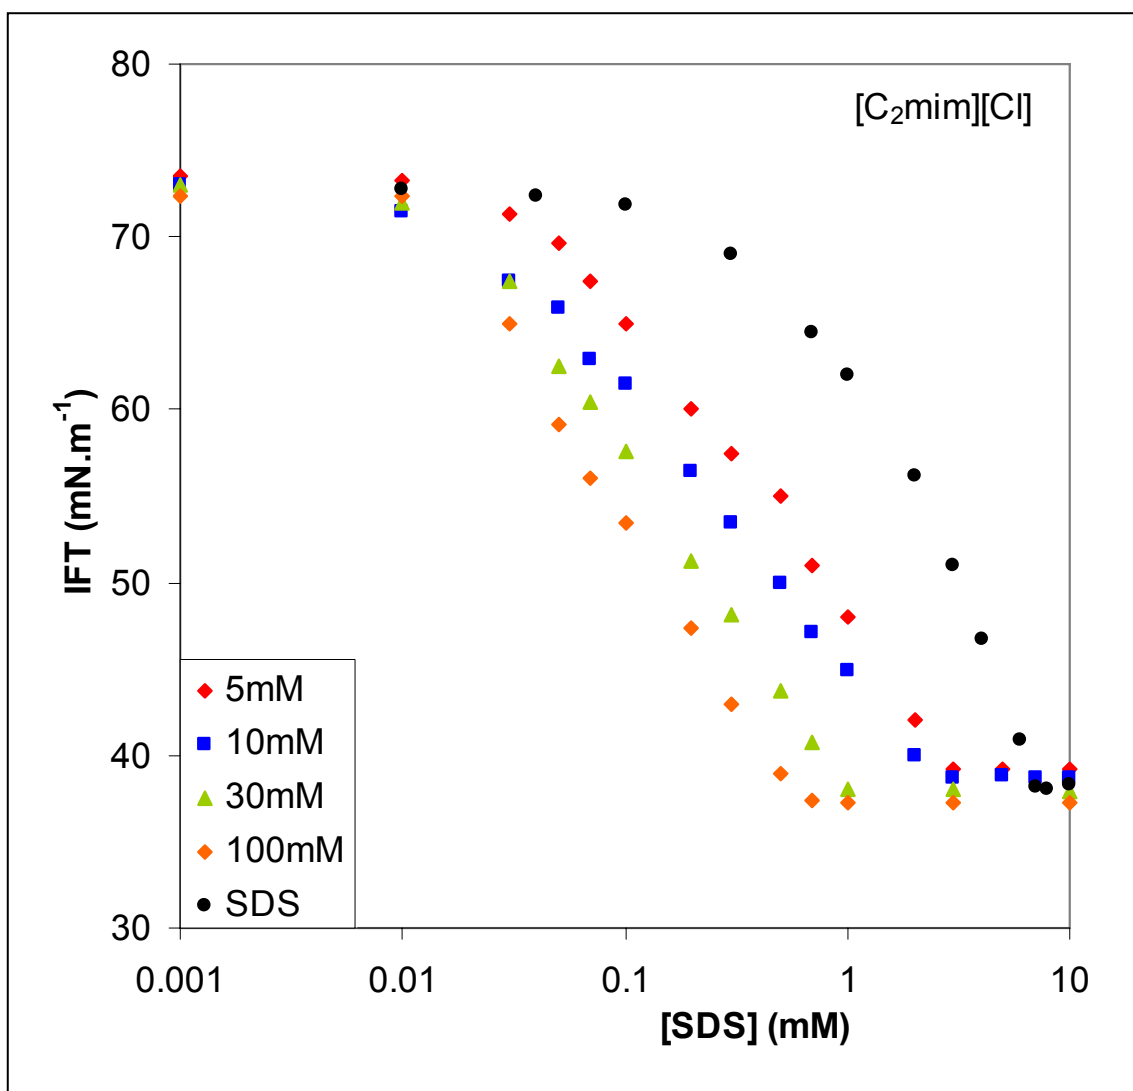

Figure S3 – Concentration effect of [C<sub>2</sub>mim]Cl measured by IFT.

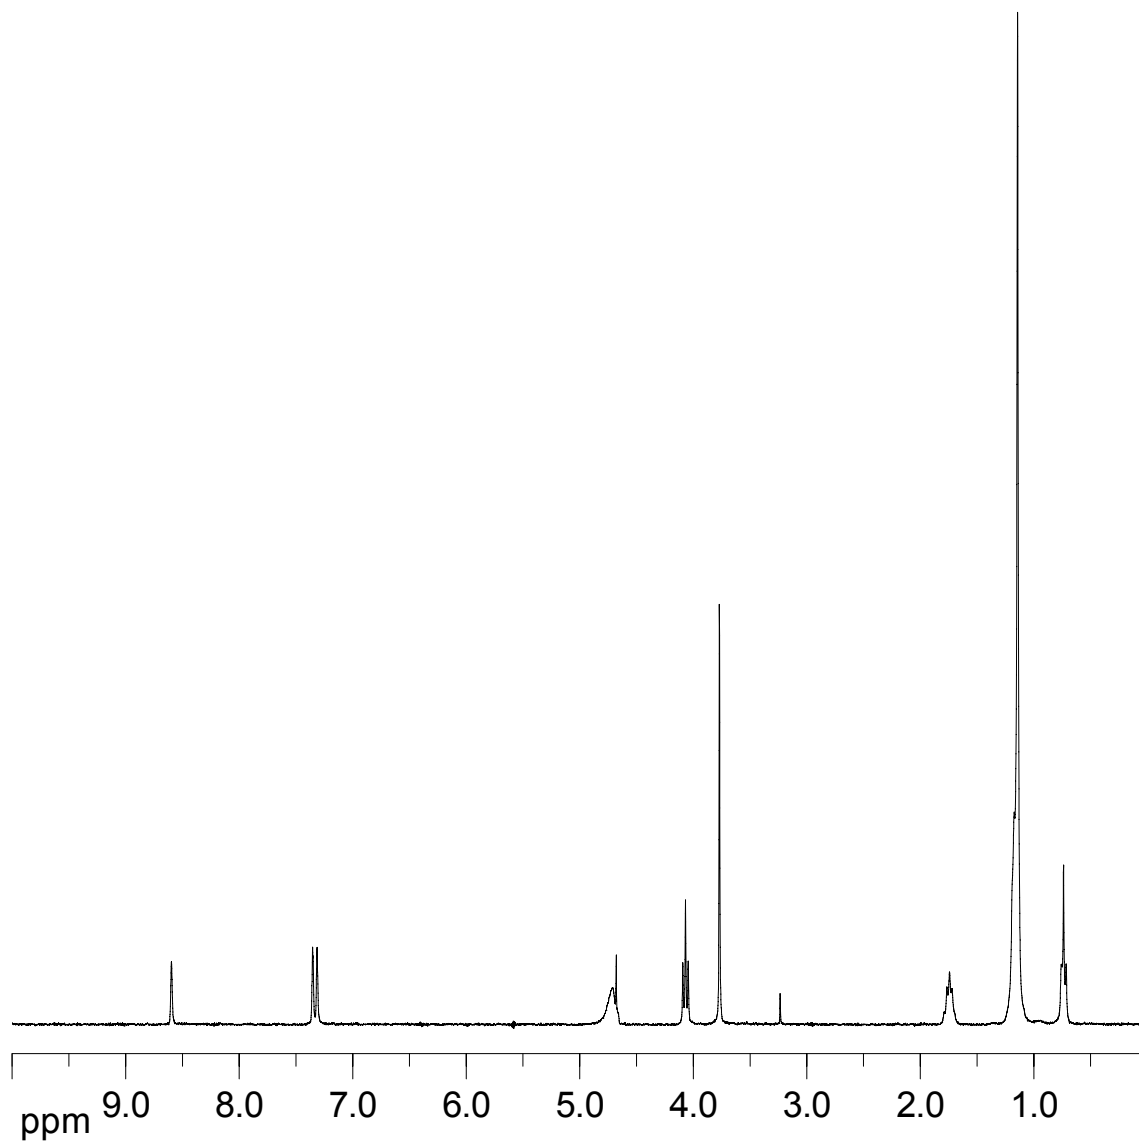

Figure S4 –  $^1\text{H}$  NMR spectrum of an aqueous solution of  $[\text{C}_{12}\text{mim}]\text{Cl}$  (conc. 12 mM).
